# Supplementary material for: Post-transplantation cyclophosphamide reduces the incidence of acute graft-versus-host disease in patients with acute myeloid leukemia/myelodysplastic syndromes who receive immune checkpoint inhibitors after allogeneic hematopoietic stem cell transplantation
Source: PubMed Central journal article supplement — J Immunother Cancer. 2021 Feb 26;9(2):e001818. doi: 10.1136/jitc-2020-001818 (PMC7919586; doi:10.1136/jitc-2020-001818), 2021-02-26
Supplement: jitc-2020-001818supp001.pdf [file jitc-2020-001818supp001.pdf]

**Supplementary Table 1.** ICI dose, GVHD prophylaxis and GVHD outcomes.

| Patient         | Primary disease | ICI                          | ICI dose, mg/kg | GVHD prophylaxis | GVHD (grade) |
|-----------------|-----------------|------------------------------|-----------------|------------------|--------------|
| 1               | AML             | IPI                          | 1               | PTCy             | None         |
| 2               | AML             | IPI                          | 1               | PTCy             | None         |
| 3               | AML             | IPI                          | 10              | Non-PTCy         | None         |
| 4               | AML             | NV                           | 1               | PTCy             | None         |
| 5               | AML             | NV                           | 3               | Non-PTCy         | None         |
| 6               | AML             | NV                           | 1               | PTCy             | None         |
| 7               | AML             | NV                           | 1               | PTCy             | aGVHD (2) *  |
| 8               | AML             | NV + cytarabine + idarubicin | 1               | Non-PTCy         | None         |
| 9               | AML             | NV + Aza                     | 3               | PTCy             | None         |
| 10              | AML             | NV + Aza                     | 3               | Non-PTCy         | None         |
| 11              | AML             | NV + Aza                     | 3               | Non-PTCy         | None         |
| 12              | AML             | NV + Aza                     | 3               | PTCy             | None         |
| 13              | AML             | NV + Aza                     | 3               | Non-PTCy         | aGVHD (2) *  |
| 14              | AML             | NV + Aza                     | 3               | PTCy             | aGVHD (3) †  |
| 15              | AML             | NV + Aza                     | 3               | Non-PTCy         | aGVHD (3) *  |
| 16              | AML             | PZ                           | 2               | PTCy             | None         |
| 17 <sup>#</sup> | MDS             | IPI                          | 1               | PTCy             | None         |
| 18              | MDS             | IPI + Aza                    | 3               | PTCy             | None         |
| 19              | MDS             | NV                           | 1               | PTCy             | None         |
| 20              | MDS             | NV +Aza                      | 3               | Non-PTCy         | None         |
| 21              | MDS             | NV +Aza                      | 3               | Non-PTCy         | None         |

Abbreviations: AML, acute myeloid leukemia; MDS, myelodysplastic syndromes; ICI, immune checkpoint inhibitor; GVHD, graft versus host disease; IPI, ipilimumab; NV, nivolumab; Aza, 5-azacytidine; PTCy, post-transplant cyclophosphamide.

\*exacerbation of previous history of aGVHD following initiation of ICI.

† new onset aGVHD following initiation of ICI.

<sup>#</sup> Patient 17 received ICI prior to alloHCT in the form of combination of ipilimumab, nivolumab and azacytidine

**Supplementary Table 2.** Cox regression analysis of acute GVHD incidence.

| Covariate                                     | Univariate |            |               | Multivariable |           |               |
|-----------------------------------------------|------------|------------|---------------|---------------|-----------|---------------|
|                                               | HR         | 95% CI     | P*            | HR            | 95% CI    | P*            |
| Age at alloHCT                                | 0.97       | 0.91-1.02  | 0.2023        |               |           |               |
| Sex (Female vs Male)                          | 0.59       | 0.07-4.74  | 0.6209        |               |           |               |
| HCT-CI score (continuous)                     | 0.57       | 0.37-0.89  | <b>0.0131</b> | 0.54          | 0.31-0.94 | <b>0.0278</b> |
| Stem cell type (ref=HPC-A)                    | 2.12       | 0.33-13.54 | 0.4268        |               |           |               |
| Myeloablative status (ref=nonmyeloablative)   | 1.69       | 0.21-13.53 | 0.6209        |               |           |               |
| Sex match/mismatch (ref=M/M and F/F)          | 3.71       | 0.36-38.60 | 0.2728        |               |           |               |
| Recipient CMV serostatus (ref=R/R)            | 0.29       | 0.03-2.71  | 0.2767        |               |           |               |
| Donor relation (ref=unrelated)                | 0.95       | 0.15-6.15  | 0.9580        |               |           |               |
| Donor type (ref=matched unrelated)            | 2.59       | 0.32-21.11 | 0.3730        |               |           |               |
| PTCy (yes vs no)                              | 0.73       | 0.11-4.74  | 0.7415        | 0.10          | 0.02-0.63 | <b>0.0143</b> |
| Pre-ICI history of GVHD (yes vs no)           | 3.66       | 0.58-23.30 | 0.1693        |               |           |               |
| Months from alloHCT to ICI therapy initiation | 1.00       | 0.99-1.00  | 0.0664        | 0.99          | 0.98-1.00 | 0.0748        |

Abbreviations: GVHD, graft-versus-host disease; HR, hazard ratio; CI, confidence interval; alloHCT, allogeneic hematopoietic stem cell transplantation; HCT-CI, hematopoietic cell transplantation-specific comorbidity index; Ref, reference group; HPC-A, hematopoietic progenitor stem cell via apheresis; CMV, cytomegalovirus; R, reactive; PTCy, post-transplantation cyclophosphamide; ICI, immune checkpoint inhibitor.

\*P values shown in bold represent  $P < 0.05$ .
